# Supplementary material for: Genomic Ancestry, Self-Reported “Color” and Quantitative Measures of Skin Pigmentation in Brazilian Admixed Siblings
Source: PLoS One. 2011 Nov 2;6(11):e27162. doi: 10.1371/journal.pone.0027162 (PMC3206941; doi:10.1371/journal.pone.0027162)
Supplement: Table S1 — Genomic Ancestry estimated by Admixmap and Structure. (XLSX) [file pone.0027162.s001.xlsx]

## Sheet: Supplementary Table
Table S1: Genomic Ancestry estimated by Admixmap and Structure
	Genomic Ancestry by Admixmap			Genomic Ancestry by Structure (90% Confidence Intervals)
Identification	AMR	AFR	EUR	AMR	AFR	EUR	AMR (90% CI)	AFR (90% CI)	EUR (90% CI)
1	0.08	0.359	0.561	0.01	0.473	0.517	(0.000,0.067)	(0.301,0.641)	(0.347,0.689)
2	0.073	0.358	0.569	0.008	0.46	0.532	(0.000,0.054)	(0.293,0.625)	(0.365,0.699)
3	0.066	0.148	0.786	0.014	0.098	0.888	(0.000,0.096)	(0.000,0.259)	(0.728,1.000)
4	0.066	0.106	0.829	0.006	0.021	0.973	(0.000,0.040)	(0.000,0.102)	(0.876,1.000)
5	0.102	0.242	0.657	0.024	0.277	0.699	(0.000,0.178)	(0.106,0.457)	(0.504,0.875)
6	0.094	0.254	0.652	0.019	0.291	0.691	(0.000,0.138)	(0.130,0.462)	(0.510,0.856)
7	0.057	0.111	0.831	0.004	0.031	0.964	(0.000,0.025)	(0.000,0.130)	(0.860,1.000)
8	0.069	0.075	0.856	0.008	0.01	0.983	(0.000,0.048)	(0.000,0.049)	(0.917,1.000)
9	0.094	0.263	0.643	0.019	0.33	0.652	(0.000,0.138)	(0.154,0.513)	(0.462,0.829)
10	0.124	0.15	0.726	0.068	0.126	0.806	(0.000,0.348)	(0.003,0.284)	(0.579,0.962)
11	0.09	0.226	0.684	0.018	0.262	0.72	(0.000,0.133)	(0.093,0.439)	(0.537,0.888)
12	0.165	0.115	0.72	0.265	0.029	0.706	(0.000,0.541)	(0.000,0.144)	(0.445,0.961)
13	0.075	0.169	0.756	0.01	0.106	0.884	(0.000,0.071)	(0.000,0.306)	(0.684,1.000)
14	0.125	0.257	0.618	0.066	0.333	0.602	(0.000,0.372)	(0.103,0.533)	(0.381,0.800)
15	0.106	0.269	0.625	0.033	0.342	0.625	(0.000,0.226)	(0.163,0.521)	(0.433,0.803)
16	0.083	0.285	0.632	0.012	0.354	0.633	(0.000,0.084)	(0.181,0.532)	(0.451,0.808)
17	0.196	0.224	0.58	0.351	0.172	0.477	(0.000,0.663)	(0.000,0.437)	(0.235,0.725)
18	0.126	0.242	0.632	0.073	0.283	0.644	(0.000,0.368)	(0.052,0.481)	(0.430,0.836)
19	0.145	0.256	0.599	0.09	0.307	0.603	(0.000,0.415)	(0.111,0.501)	(0.356,0.809)
20	0.151	0.35	0.499	0.099	0.471	0.43	(0.000,0.434)	(0.257,0.664)	(0.187,0.642)
21	0.079	0.267	0.653	0.012	0.324	0.664	(0.000,0.084)	(0.164,0.493)	(0.490,0.826)
22	0.076	0.237	0.687	0.01	0.284	0.707	(0.000,0.064)	(0.126,0.454)	(0.534,0.863)
23	0.101	0.236	0.663	0.021	0.281	0.699	(0.000,0.151)	(0.108,0.460)	(0.508,0.874)
24	0.071	0.294	0.635	0.008	0.362	0.63	(0.000,0.050)	(0.192,0.539)	(0.449,0.802)
25	0.116	0.21	0.674	0.048	0.239	0.713	(0.000,0.304)	(0.040,0.418)	(0.524,0.874)
26	0.111	0.17	0.719	0.064	0.138	0.799	(0.000,0.319)	(0.000,0.334)	(0.584,0.975)
27	0.264	0.164	0.572	0.553	0.041	0.406	(0.312,0.771)	(0.000,0.186)	(0.192,0.637)
28	0.155	0.344	0.501	0.159	0.469	0.372	(0.000,0.524)	(0.222,0.686)	(0.109,0.604)
29	0.055	0.142	0.803	0.005	0.047	0.948	(0.000,0.030)	(0.000,0.199)	(0.792,1.000)
30	0.052	0.126	0.822	0.004	0.03	0.966	(0.000,0.022)	(0.000,0.142)	(0.850,1.000)
31	0.066	0.219	0.714	0.007	0.217	0.776	(0.000,0.047)	(0.028,0.402)	(0.589,0.965)
32	0.112	0.164	0.724	0.058	0.153	0.789	(0.000,0.309)	(0.009,0.322)	(0.582,0.946)
33	0.066	0.1	0.834	0.005	0.02	0.975	(0.000,0.031)	(0.000,0.098)	(0.885,1.000)
34	0.097	0.151	0.752	0.032	0.102	0.865	(0.000,0.219)	(0.000,0.272)	(0.675,1.000)
35	0.134	0.207	0.658	0.089	0.205	0.706	(0.000,0.404)	(0.002,0.405)	(0.474,0.910)
36	0.079	0.317	0.604	0.012	0.392	0.596	(0.000,0.084)	(0.226,0.560)	(0.422,0.763)
37	0.082	0.225	0.693	0.014	0.269	0.718	(0.000,0.093)	(0.104,0.444)	(0.541,0.878)
38	0.102	0.274	0.624	0.029	0.343	0.628	(0.000,0.210)	(0.159,0.524)	(0.439,0.806)
39	0.097	0.279	0.624	0.02	0.353	0.627	(0.000,0.148)	(0.179,0.533)	(0.437,0.804)
40	0.079	0.155	0.766	0.016	0.131	0.853	(0.000,0.116)	(0.001,0.287)	(0.687,0.993)
41	0.092	0.229	0.678	0.016	0.276	0.708	(0.000,0.116)	(0.091,0.464)	(0.512,0.895)
42	0.12	0.193	0.686	0.096	0.204	0.7	(0.000,0.409)	(0.000,0.409)	(0.476,0.886)
43	0.084	0.298	0.618	0.012	0.395	0.593	(0.000,0.079)	(0.219,0.575)	(0.410,0.770)
44	0.1	0.386	0.514	0.032	0.518	0.45	(0.000,0.227)	(0.340,0.686)	(0.262,0.630)
45	0.103	0.236	0.662	0.022	0.281	0.697	(0.000,0.162)	(0.102,0.463)	(0.509,0.872)
46	0.077	0.201	0.722	0.011	0.206	0.783	(0.000,0.074)	(0.065,0.369)	(0.616,0.927)
47	0.073	0.282	0.644	0.008	0.36	0.632	(0.000,0.054)	(0.189,0.535)	(0.454,0.803)
48	0.095	0.3	0.605	0.018	0.382	0.6	(0.000,0.128)	(0.202,0.565)	(0.411,0.782)
49	0.117	0.199	0.684	0.07	0.206	0.724	(0.000,0.367)	(0.001,0.408)	(0.507,0.911)
50	0.061	0.28	0.66	0.006	0.335	0.659	(0.000,0.035)	(0.157,0.522)	(0.471,0.838)
51	0.073	0.317	0.61	0.009	0.402	0.589	(0.000,0.061)	(0.231,0.577)	(0.411,0.761)
52	0.081	0.227	0.693	0.013	0.266	0.721	(0.000,0.094)	(0.090,0.451)	(0.532,0.894)
53	0.116	0.185	0.698	0.045	0.164	0.79	(0.000,0.282)	(0.000,0.359)	(0.562,0.993)
54	0.114	0.162	0.724	0.046	0.12	0.834	(0.000,0.284)	(0.000,0.314)	(0.607,1.000)
55	0.094	0.32	0.586	0.016	0.428	0.555	(0.000,0.115)	(0.239,0.615)	(0.367,0.745)
56	0.092	0.178	0.729	0.022	0.151	0.827	(0.000,0.158)	(0.000,0.355)	(0.619,1.000)
57	0.071	0.283	0.646	0.009	0.334	0.657	(0.000,0.055)	(0.149,0.519)	(0.471,0.842)
58	0.071	0.187	0.742	0.01	0.136	0.854	(0.000,0.069)	(0.000,0.340)	(0.648,1.000)
59	0.119	0.137	0.745	0.102	0.081	0.817	(0.000,0.400)	(0.000,0.259)	(0.568,0.998)
60	0.112	0.127	0.761	0.033	0.05	0.917	(0.000,0.225)	(0.000,0.201)	(0.712,1.000)
61	0.058	0.283	0.659	0.005	0.345	0.65	(0.000,0.031)	(0.173,0.523)	(0.471,0.822)
62	0.068	0.236	0.696	0.007	0.271	0.722	(0.000,0.044)	(0.093,0.455)	(0.536,0.900)
63	0.089	0.153	0.758	0.018	0.115	0.867	(0.000,0.128)	(0.002,0.268)	(0.699,0.994)
64	0.064	0.125	0.811	0.007	0.033	0.959	(0.000,0.049)	(0.000,0.147)	(0.836,1.000)
65	0.108	0.244	0.648	0.028	0.297	0.676	(0.000,0.200)	(0.123,0.478)	(0.482,0.851)
66	0.087	0.24	0.673	0.015	0.275	0.71	(0.000,0.112)	(0.124,0.440)	(0.538,0.863)
67	0.133	0.14	0.726	0.109	0.06	0.831	(0.000,0.409)	(0.000,0.240)	(0.555,1.000)
68	0.112	0.224	0.663	0.038	0.27	0.692	(0.000,0.265)	(0.083,0.454)	(0.494,0.865)
69	0.078	0.135	0.787	0.013	0.056	0.932	(0.000,0.092)	(0.000,0.196)	(0.779,1.000)
70	0.059	0.272	0.669	0.005	0.318	0.676	(0.000,0.032)	(0.153,0.490)	(0.503,0.842)
71	0.092	0.357	0.551	0.019	0.48	0.501	(0.000,0.140)	(0.303,0.654)	(0.319,0.678)
72	0.083	0.327	0.589	0.016	0.434	0.55	(0.000,0.114)	(0.251,0.618)	(0.363,0.733)
73	0.06	0.247	0.692	0.005	0.283	0.711	(0.000,0.030)	(0.088,0.476)	(0.518,0.907)
74	0.079	0.212	0.709	0.017	0.241	0.743	(0.000,0.122)	(0.068,0.420)	(0.561,0.906)
75	0.082	0.193	0.725	0.016	0.178	0.806	(0.000,0.119)	(0.003,0.363)	(0.618,0.979)
76	0.102	0.242	0.656	0.027	0.283	0.689	(0.000,0.201)	(0.116,0.457)	(0.503,0.853)
77	0.075	0.146	0.779	0.016	0.096	0.888	(0.000,0.117)	(0.000,0.253)	(0.723,1.000)
78	0.093	0.292	0.615	0.017	0.365	0.618	(0.000,0.127)	(0.191,0.541)	(0.434,0.795)
79	0.145	0.265	0.59	0.087	0.327	0.585	(0.000,0.421)	(0.134,0.521)	(0.333,0.791)
80	0.122	0.22	0.658	0.051	0.254	0.696	(0.000,0.314)	(0.078,0.437)	(0.476,0.877)
81	0.081	0.086	0.833	0.01	0.012	0.978	(0.000,0.059)	(0.000,0.065)	(0.896,1.000)
82	0.108	0.124	0.768	0.027	0.071	0.902	(0.000,0.192)	(0.000,0.202)	(0.721,1.000)
83	0.124	0.156	0.72	0.123	0.112	0.765	(0.000,0.429)	(0.000,0.307)	(0.532,0.948)
84	0.166	0.175	0.659	0.289	0.092	0.619	(0.000,0.599)	(0.000,0.325)	(0.364,0.876)
85	0.164	0.209	0.627	0.147	0.215	0.639	(0.000,0.487)	(0.005,0.425)	(0.361,0.872)
86	0.17	0.148	0.682	0.275	0.063	0.662	(0.000,0.561)	(0.000,0.245)	(0.403,0.910)
87	0.101	0.286	0.613	0.022	0.358	0.62	(0.000,0.161)	(0.183,0.536)	(0.430,0.798)
88	0.102	0.181	0.717	0.023	0.18	0.797	(0.000,0.165)	(0.033,0.344)	(0.616,0.953)
89	0.056	0.238	0.706	0.005	0.259	0.736	(0.000,0.027)	(0.117,0.419)	(0.575,0.880)
90	0.082	0.242	0.677	0.014	0.287	0.699	(0.000,0.100)	(0.110,0.472)	(0.511,0.872)
91	0.053	0.162	0.785	0.004	0.097	0.899	(0.000,0.025)	(0.000,0.262)	(0.731,1.000)
92	0.079	0.154	0.767	0.017	0.114	0.869	(0.000,0.123)	(0.000,0.277)	(0.705,0.999)
93	0.084	0.214	0.702	0.018	0.245	0.736	(0.000,0.135)	(0.083,0.417)	(0.558,0.894)
94	0.078	0.275	0.647	0.011	0.362	0.627	(0.000,0.077)	(0.191,0.537)	(0.451,0.797)
95	0.113	0.254	0.633	0.026	0.308	0.665	(0.000,0.195)	(0.134,0.488)	(0.471,0.842)
96	0.107	0.187	0.706	0.044	0.167	0.788	(0.000,0.276)	(0.000,0.369)	(0.573,0.992)
97	0.089	0.136	0.775	0.035	0.076	0.889	(0.000,0.218)	(0.000,0.222)	(0.710,1.000)
98	0.091	0.133	0.776	0.021	0.05	0.929	(0.000,0.150)	(0.000,0.194)	(0.759,1.000)
99	0.094	0.309	0.597	0.023	0.393	0.584	(0.000,0.169)	(0.212,0.576)	(0.394,0.762)
100	0.128	0.238	0.634	0.069	0.303	0.629	(0.000,0.370)	(0.057,0.505)	(0.415,0.816)
101	0.102	0.22	0.678	0.03	0.253	0.717	(0.000,0.211)	(0.089,0.427)	(0.529,0.880)
102	0.124	0.121	0.756	0.091	0.065	0.844	(0.000,0.359)	(0.000,0.206)	(0.607,0.996)
103	0.069	0.282	0.649	0.007	0.338	0.655	(0.000,0.044)	(0.169,0.511)	(0.480,0.824)
104	0.07	0.359	0.571	0.007	0.474	0.519	(0.000,0.043)	(0.294,0.650)	(0.341,0.700)
105	0.129	0.343	0.528	0.073	0.456	0.471	(0.000,0.387)	(0.262,0.641)	(0.216,0.677)
106	0.105	0.305	0.591	0.03	0.394	0.576	(0.000,0.208)	(0.222,0.566)	(0.387,0.752)
107	0.13	0.241	0.629	0.066	0.289	0.645	(0.000,0.372)	(0.026,0.503)	(0.419,0.858)
108	0.13	0.374	0.496	0.064	0.5	0.437	(0.000,0.354)	(0.301,0.683)	(0.221,0.631)
109	0.069	0.193	0.737	0.01	0.201	0.789	(0.000,0.063)	(0.068,0.358)	(0.629,0.923)
110	0.079	0.206	0.715	0.012	0.224	0.764	(0.000,0.087)	(0.073,0.393)	(0.589,0.917)
111	0.081	0.242	0.677	0.01	0.291	0.699	(0.000,0.069)	(0.118,0.469)	(0.519,0.872)
112	0.101	0.129	0.77	0.038	0.05	0.912	(0.000,0.233)	(0.000,0.187)	(0.719,1.000)
113	0.085	0.326	0.59	0.013	0.424	0.563	(0.000,0.092)	(0.247,0.599)	(0.383,0.740)
114	0.083	0.273	0.643	0.011	0.336	0.653	(0.000,0.076)	(0.167,0.512)	(0.471,0.825)
115	0.11	0.332	0.558	0.03	0.434	0.536	(0.000,0.213)	(0.253,0.611)	(0.346,0.718)
116	0.092	0.233	0.675	0.014	0.245	0.74	(0.000,0.105)	(0.051,0.428)	(0.554,0.930)
117	0.074	0.179	0.747	0.008	0.162	0.83	(0.000,0.052)	(0.019,0.325)	(0.663,0.976)
118	0.062	0.081	0.858	0.005	0.01	0.985	(0.000,0.031)	(0.000,0.053)	(0.925,1.000)
119	0.125	0.232	0.643	0.056	0.28	0.664	(0.000,0.325)	(0.103,0.457)	(0.455,0.841)
120	0.134	0.104	0.762	0.153	0.033	0.813	(0.000,0.418)	(0.000,0.149)	(0.567,0.997)
121	0.125	0.246	0.629	0.059	0.283	0.658	(0.000,0.333)	(0.105,0.465)	(0.430,0.849)
122	0.069	0.259	0.673	0.007	0.301	0.692	(0.000,0.047)	(0.137,0.474)	(0.518,0.856)
123	0.091	0.167	0.743	0.02	0.163	0.817	(0.000,0.145)	(0.033,0.319)	(0.649,0.950)
124	0.088	0.205	0.707	0.02	0.218	0.762	(0.000,0.147)	(0.046,0.396)	(0.577,0.930)
125	0.152	0.16	0.688	0.192	0.13	0.678	(0.000,0.517)	(0.000,0.318)	(0.415,0.892)
126	0.174	0.164	0.663	0.371	0.058	0.571	(0.000,0.631)	(0.000,0.265)	(0.338,0.804)
127	0.122	0.122	0.757	0.056	0.038	0.906	(0.000,0.305)	(0.000,0.168)	(0.667,1.000)
128	0.09	0.177	0.733	0.019	0.124	0.857	(0.000,0.135)	(0.000,0.326)	(0.646,1.000)
129	0.177	0.118	0.705	0.218	0.03	0.752	(0.000,0.553)	(0.000,0.148)	(0.428,1.000)
130	0.083	0.17	0.748	0.022	0.158	0.821	(0.000,0.155)	(0.006,0.320)	(0.657,0.959)
131	0.131	0.239	0.63	0.081	0.307	0.611	(0.000,0.408)	(0.053,0.510)	(0.394,0.800)
132	0.142	0.213	0.645	0.103	0.256	0.642	(0.000,0.455)	(0.049,0.451)	(0.392,0.837)
133	0.138	0.227	0.635	0.103	0.253	0.644	(0.000,0.430)	(0.002,0.476)	(0.414,0.851)
134	0.113	0.244	0.644	0.044	0.298	0.658	(0.000,0.277)	(0.118,0.481)	(0.454,0.840)
135	0.056	0.145	0.798	0.006	0.122	0.872	(0.000,0.037)	(0.022,0.247)	(0.744,0.974)
136	0.09	0.145	0.765	0.038	0.119	0.843	(0.000,0.218)	(0.000,0.274)	(0.681,0.970)
137	0.105	0.159	0.736	0.035	0.09	0.875	(0.000,0.230)	(0.000,0.263)	(0.669,1.000)
138	0.082	0.148	0.77	0.017	0.104	0.879	(0.000,0.122)	(0.000,0.254)	(0.718,0.999)
139	0.075	0.166	0.759	0.009	0.13	0.861	(0.000,0.056)	(0.002,0.292)	(0.691,0.994)
140	0.062	0.125	0.813	0.006	0.037	0.957	(0.000,0.038)	(0.000,0.159)	(0.827,1.000)
141	0.118	0.217	0.665	0.053	0.236	0.71	(0.000,0.315)	(0.041,0.424)	(0.491,0.902)
142	0.143	0.226	0.631	0.108	0.248	0.644	(0.000,0.443)	(0.036,0.443)	(0.401,0.842)
143	0.081	0.221	0.698	0.015	0.257	0.728	(0.000,0.109)	(0.110,0.420)	(0.558,0.876)
144	0.094	0.161	0.745	0.032	0.149	0.819	(0.000,0.209)	(0.006,0.300)	(0.658,0.952)
145	0.051	0.239	0.711	0.004	0.274	0.722	(0.000,0.020)	(0.106,0.455)	(0.541,0.891)
146	0.082	0.275	0.643	0.013	0.354	0.633	(0.000,0.090)	(0.186,0.526)	(0.458,0.801)
147	0.125	0.129	0.746	0.081	0.043	0.876	(0.000,0.360)	(0.000,0.178)	(0.614,1.000)
148	0.096	0.173	0.731	0.032	0.149	0.819	(0.000,0.218)	(0.001,0.314)	(0.640,0.976)
149	0.111	0.302	0.587	0.034	0.385	0.581	(0.000,0.237)	(0.214,0.558)	(0.386,0.755)
150	0.213	0.236	0.551	0.429	0.195	0.376	(0.000,0.717)	(0.003,0.428)	(0.124,0.660)
151	0.111	0.196	0.693	0.045	0.213	0.742	(0.000,0.282)	(0.014,0.403)	(0.542,0.914)
152	0.062	0.241	0.697	0.006	0.272	0.722	(0.000,0.037)	(0.098,0.458)	(0.533,0.896)
153	0.106	0.14	0.753	0.062	0.085	0.853	(0.000,0.315)	(0.000,0.253)	(0.641,0.999)
154	0.081	0.093	0.826	0.023	0.032	0.945	(0.000,0.160)	(0.000,0.127)	(0.802,1.000)
155	0.151	0.116	0.733	0.197	0.04	0.764	(0.000,0.506)	(0.000,0.172)	(0.477,0.997)
156	0.105	0.117	0.778	0.033	0.035	0.931	(0.000,0.218)	(0.000,0.153)	(0.741,1.000)
157	0.068	0.177	0.755	0.01	0.128	0.862	(0.000,0.066)	(0.000,0.325)	(0.665,1.000)
158	0.129	0.207	0.664	0.076	0.234	0.689	(0.000,0.381)	(0.004,0.434)	(0.475,0.873)
159	0.114	0.243	0.643	0.042	0.301	0.658	(0.000,0.273)	(0.119,0.486)	(0.453,0.838)
160	0.127	0.151	0.722	0.089	0.115	0.797	(0.000,0.386)	(0.000,0.293)	(0.552,0.977)
161	0.05	0.081	0.87	0.003	0.011	0.986	(0.000,0.019)	(0.000,0.058)	(0.931,1.000)
162	0.066	0.18	0.754	0.006	0.157	0.837	(0.000,0.038)	(0.018,0.321)	(0.670,0.977)
163	0.062	0.117	0.821	0.006	0.032	0.962	(0.000,0.041)	(0.000,0.140)	(0.844,1.000)
164	0.053	0.151	0.796	0.004	0.082	0.914	(0.000,0.025)	(0.000,0.249)	(0.744,1.000)
165	0.099	0.123	0.778	0.024	0.069	0.907	(0.000,0.169)	(0.000,0.196)	(0.741,1.000)
166	0.094	0.127	0.778	0.022	0.054	0.923	(0.000,0.159)	(0.000,0.192)	(0.752,1.000)
167	0.075	0.171	0.754	0.012	0.158	0.831	(0.000,0.079)	(0.023,0.318)	(0.663,0.967)
168	0.109	0.22	0.671	0.034	0.255	0.71	(0.000,0.233)	(0.096,0.426)	(0.523,0.872)
169	0.057	0.173	0.77	0.007	0.17	0.823	(0.000,0.048)	(0.042,0.315)	(0.676,0.950)
170	0.088	0.239	0.673	0.014	0.27	0.716	(0.000,0.102)	(0.099,0.446)	(0.535,0.888)
171	0.099	0.236	0.665	0.023	0.276	0.7	(0.000,0.173)	(0.117,0.445)	(0.519,0.863)
172	0.082	0.149	0.769	0.015	0.06	0.925	(0.000,0.110)	(0.000,0.229)	(0.741,1.000)
